# Supplementary material
Source: publisher site journal article supplement (https://www.dovepress.com/article/220164)
Supplement: Supplementary file 1 [file get_supplementary_file.php]

**Supplemental Tables and Figure Legend:**

***Supplemental Table 1***: Repeatability of BDR testing 2-6 weeks after the initial

| Metric | Repeatedly positive BDR N (%) | Repeatedly negative BDR N, (%) | Variable BDR N, (%) | Repeatability (%) | Kappa, k |
| --- | --- | --- | --- | --- | --- |
| FVC | 35 (35.7) | 40 (40.8) | 23 (23.5) | 76.5 | 0.53 |
| FEV1 | 25 (25.5) | 46 (46.9) | 27 (27.6) | 72.4 | 0.43 |
| IC | 23 (23.5) | 40 (40.8) | 35 (35.8) | 64.3 | 0.27 |

***Supplemental Table 2***: Univariate and multivariate analysis of BDRFVC as a risk factor associated with exacerbations

| *Univariate Negative Binomial model for COPD exacerbations* | | | | |
| --- | --- | --- | --- | --- |
| **Label** | **RR** | **Lower_95CI** | **Upper_95CI** | **P-value** |
| FVC-BD responders vs. FVC-BD non-responders | 1.456 | 1.018 | 2.083 | 0.039524 |
|  |  |  |  |  |
| *Multivariate Negative Binomial model for COPD exacerbations* | | | | |
| **Label** | **RR** | **Lower_95CI** | **Upper_95CI** | **P-value** |
| FVC-BD responders vs. FVC-BD non-responders | 1.025 | 0.712 | 1.479 | 0.89111 |
| Post-BD FEV1 PCT (every 10% increase) | 0.714 | 0.644 | 0.791 | <0.00001 |
| Age (every 10 years increase) | 1.684 | 1.304 | 2.175 | 0.00006 |
| Use of inhaled bronchodilators | 1.752 | 1.021 | 3.007 | 0.04173 |

***Supplemental Table 3***: Univariate and multivariate analysis of isolated BDRFVC as a risk factor associated with overall survival

| *Univariate Cox proportional hazards model* | | | | |
| --- | --- | --- | --- | --- |
| **Label** | **HR** | **Lower_95CI** | **Upper_95CI** | **P value** |
| Isolated FVC-BD responders vs. *Others | 1.707 | 1.092 | 2.670 | 0.019102 |
|  |  |  |  |  |
| *Multivariate Cox proportional hazards model* | | | | |
| **Label** | **HR** | **Lower_95CI** | **Upper_95CI** | **P value** |
| Isolated FVC-BD responders vs. *Others | 0.888 | 0.556 | 1.418 | 0.62007 |
| Post-BD FEV1 PCT (every 10% increase) | 0.708 | 0.637 | 0.787 | <0.00001 |
| Age (every 10 years increase) | 1.687 | 1.307 | 2.179 | 0.00006 |
| Use of inhaled bronchodilators | 1.747 | 1.018 | 2.999 | 0.04277 |

**Others are composed of individuals with COPD who show no BDR, who show isolated BDRFEV1 or who show dual BDRFEV1/BDRFVC*

*
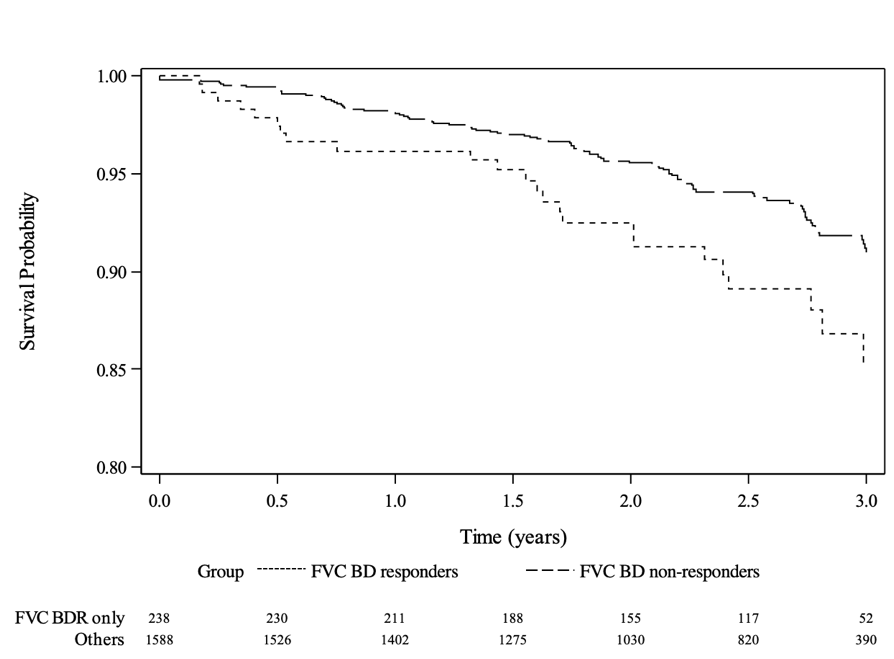
*

***Supplemental Figure 1***: Kaplan-Meier plot of overall survival up to 3 years: subjects who demonstrated BDRFVC but not BDRFEV1  have lower survival relative to other COPD participants (85.4% vs. 91.0% respectively, P<0.05)
